# Supplementary material
Source: MDPI journal article supplement (https://www.mdpi.com/1999-4907/9/10/651)
Supplement: s1 [file s1]

## Supplemental Figures and Tables

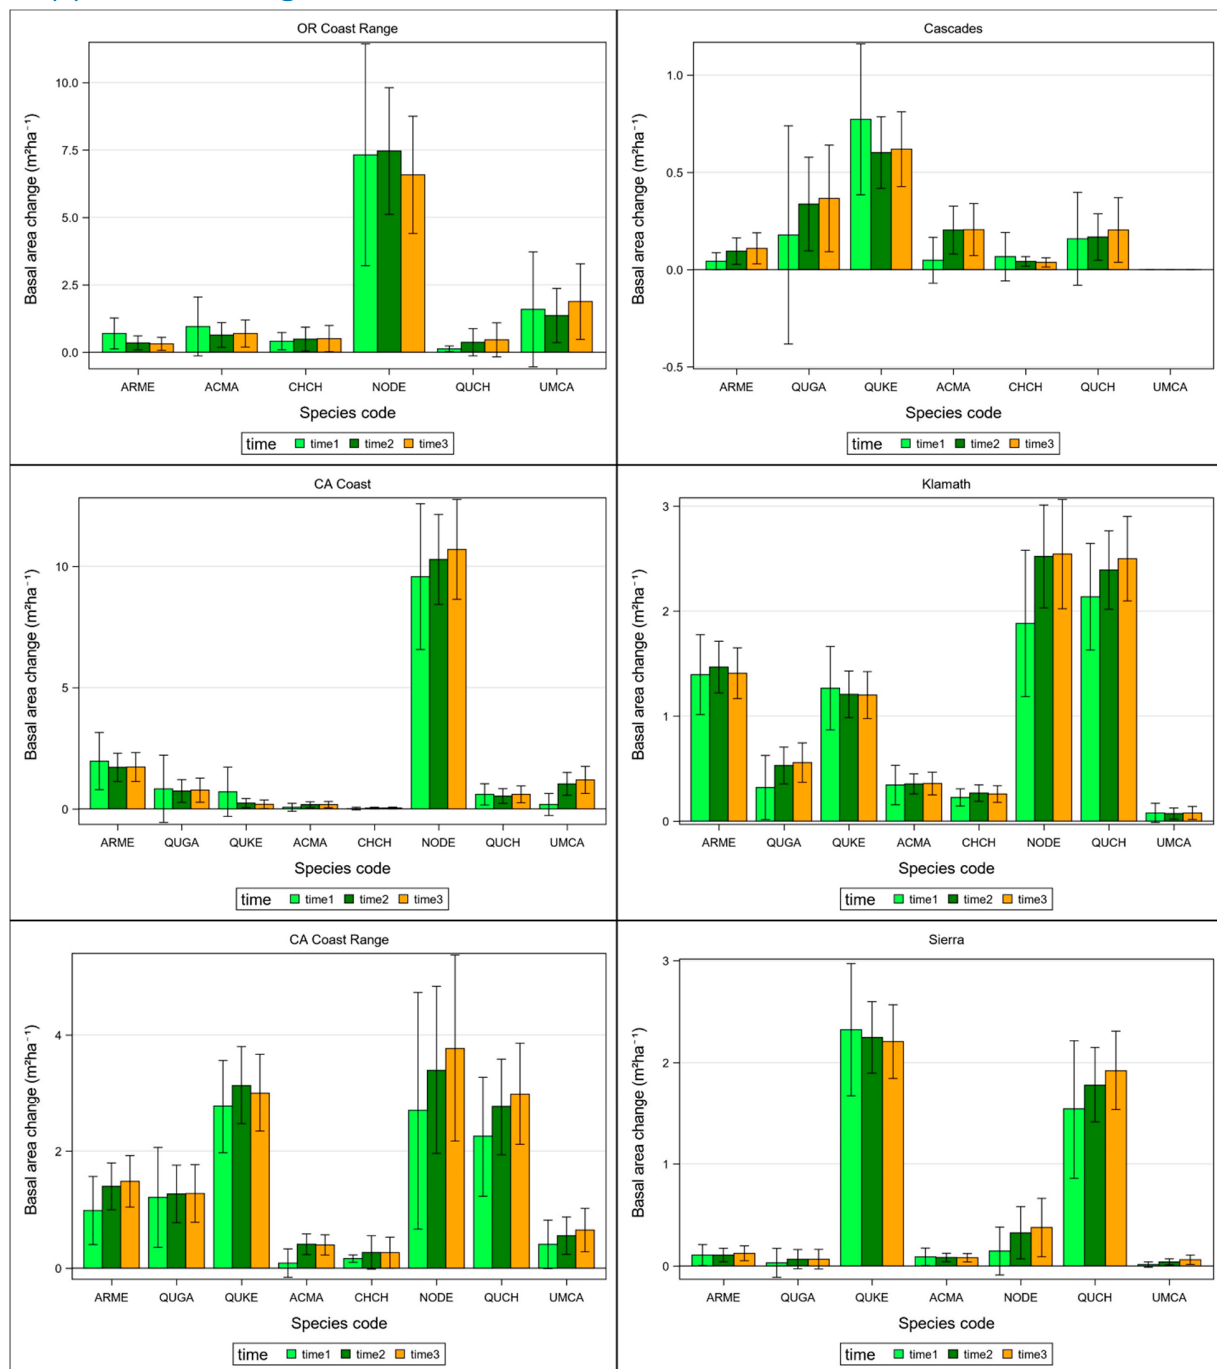

Figure S1: Three-period basal area change by ecoregion (national forest and private lands only). Error bars denote 95% confidence intervals.

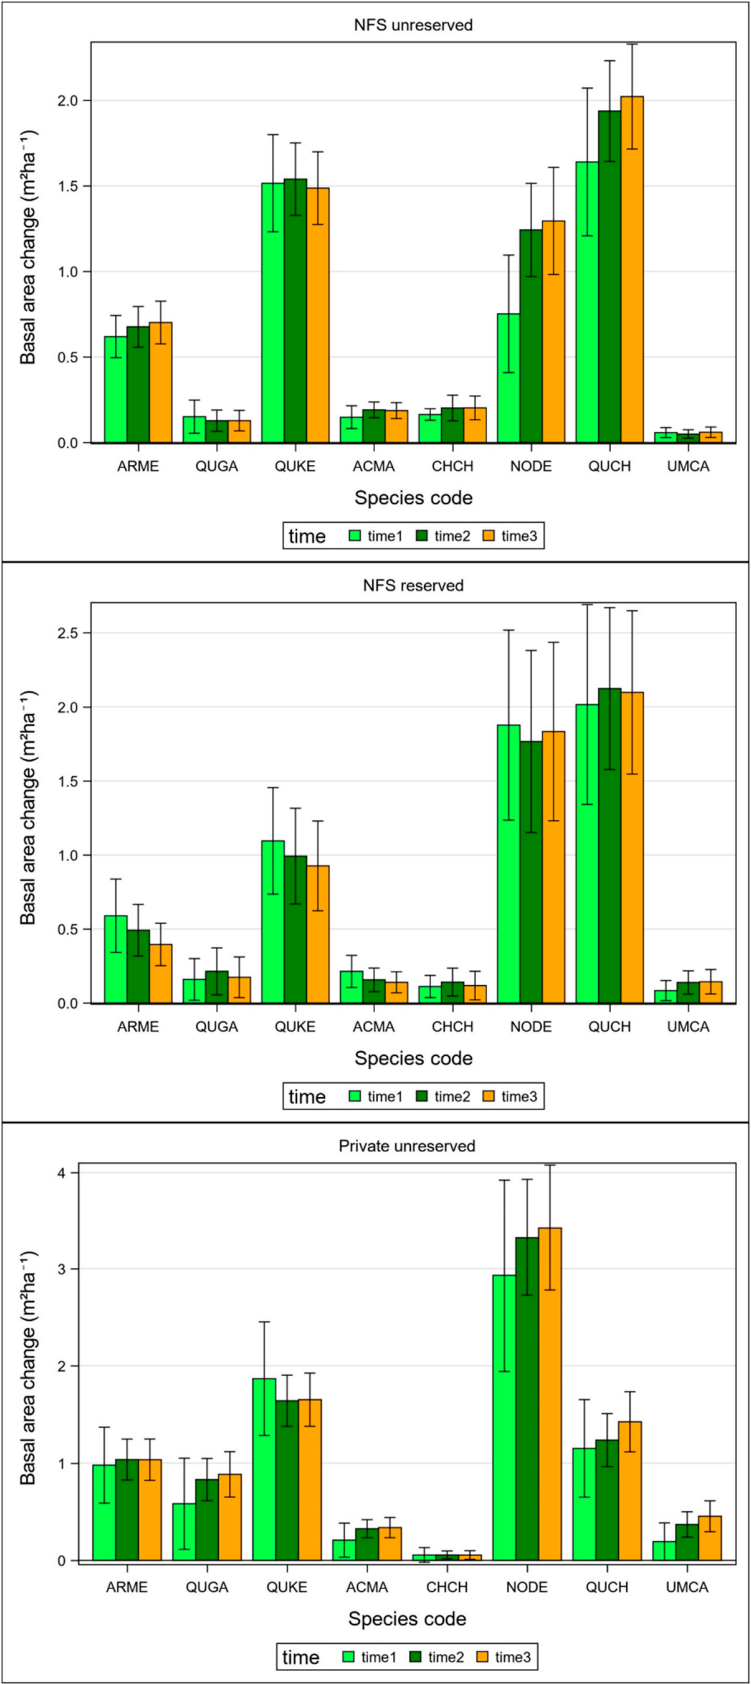

Figure S2: Three-period basal area change by ownership (NFS=National Forest System lands). Error bars denote 95% confidence intervals.

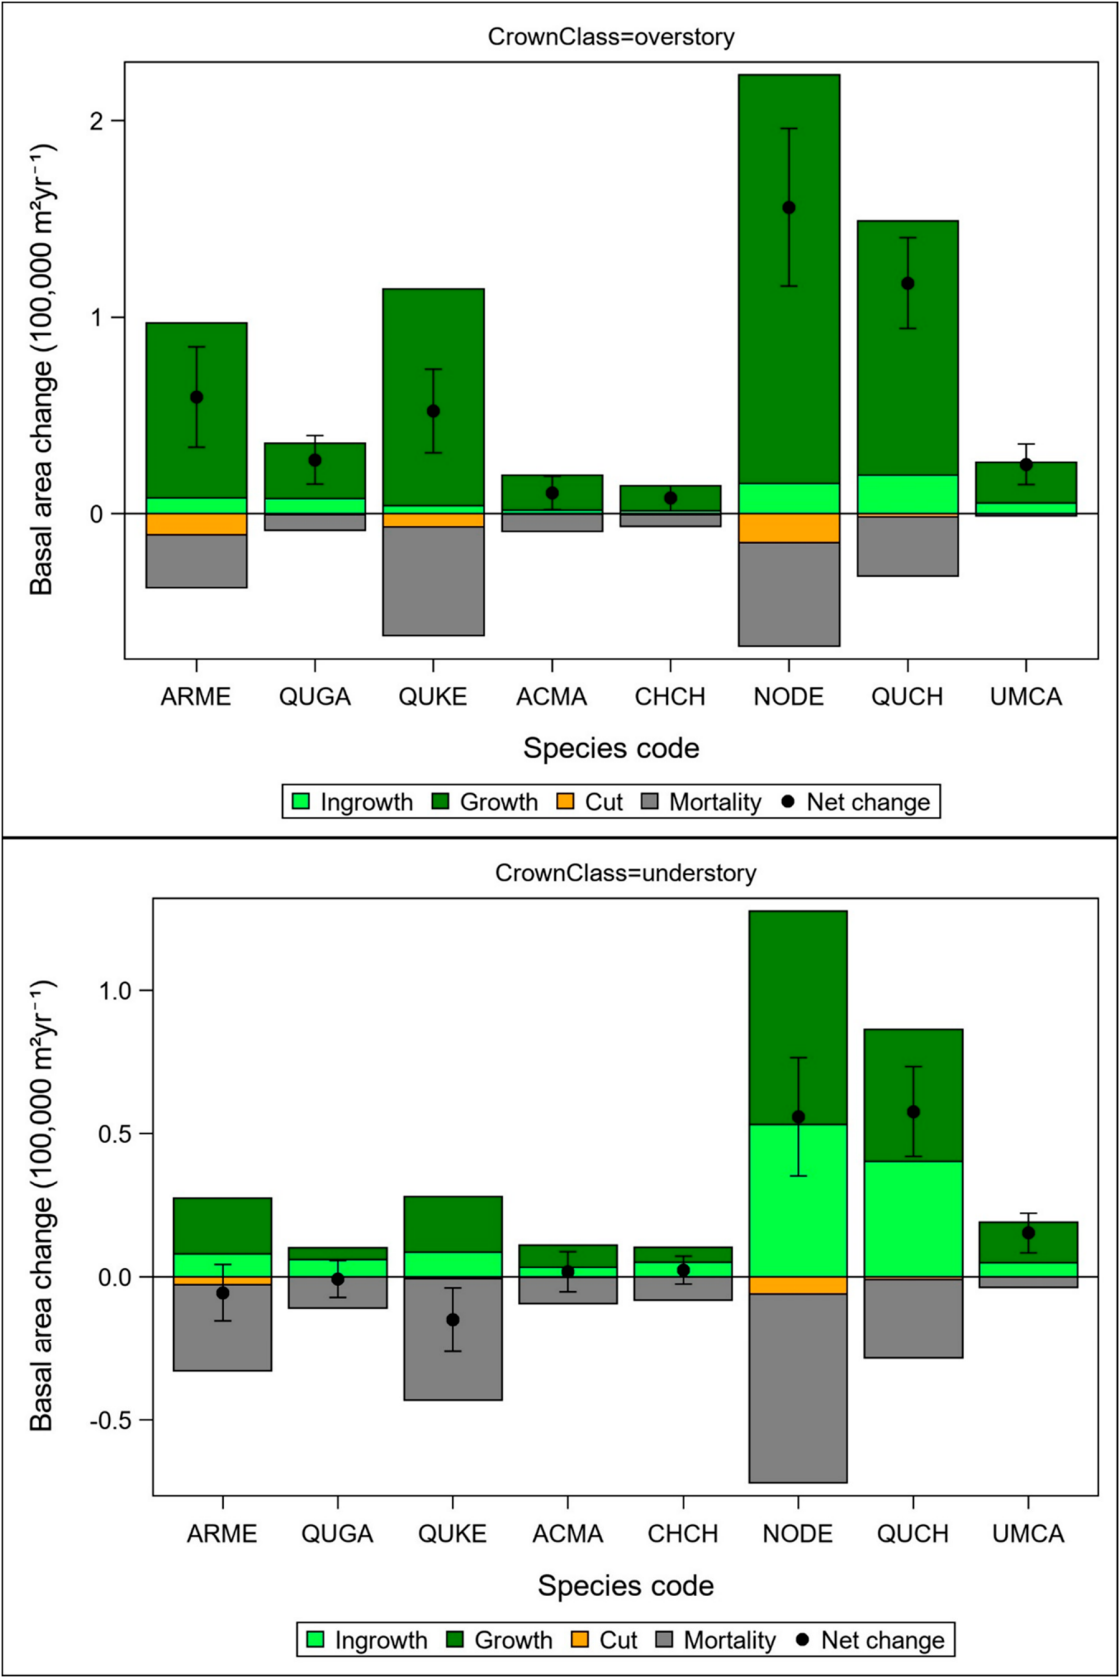

Figure S3: Basal area changes on undisturbed plots by overstory and understory crown class. Error bars denote 95% confidence intervals.

Table S1: Basal area ( $\times 1,000 \text{ m}^2$ ) by ecoregion section at time 2, with percentages of each species' total biomass within each ecoregion in parentheses.

| Ecoregion                   | Section                    | ARME            | QUGA            | QUKE            | ACMA            | CHCH            | NODE            | QUCH            | UMCA           | Total            |
|-----------------------------|----------------------------|-----------------|-----------------|-----------------|-----------------|-----------------|-----------------|-----------------|----------------|------------------|
| OR Coast Range              | OR Coast Ranges            | 118<br>(1.3%)   | 0 (0%)          | 0 (0%)          | 100<br>(4.7%)   | 127<br>(8.4%)   | 1181<br>(6%)    | 113<br>(0.7%)   | 214<br>(12%)   | 1853<br>(2.8%)   |
| Cascades                    | Modoc Plateau              | 0 (0%)          | 2 (0.1%)        | 34<br>(0.3%)    | 0 (0%)          | 0 (0%)          | 0 (0%)          | 0 (0%)          | 0 (0%)         | 36<br>(0.1%)     |
| Cascades                    | Southern Cascades          | 0 (0%)          | 537<br>(13.6%)  | 824<br>(6.2%)   | 168<br>(8%)     | 1 (0.1%)        | 0 (0%)          | 238<br>(1.5%)   | 0 (0%)         | 1768<br>(2.7%)   |
| Cascades                    | Western Cascades           | 137<br>(1.6%)   | 98<br>(2.5%)    | 52<br>(0.4%)    | 132<br>(6.3%)   | 60<br>(3.9%)    | 0 (0%)          | 5 (0%)          | 0 (0%)         | 484<br>(0.7%)    |
| Klamath                     | Klamath Mountains          | 5459<br>(62.5%) | 1583<br>(40.1%) | 3745<br>(28.2%) | 1037<br>(49.3%) | 1093<br>(71.9%) | 7033<br>(35.4%) | 6876<br>(44.6%) | 190<br>(10.6%) | 27015<br>(40.5%) |
| CA Coast                    | N CA Coast                 | 1427<br>(16.3%) | 466<br>(11.8%)  | 152<br>(1.1%)   | 128<br>(6.1%)   | 21<br>(1.4%)    | 7958<br>(40.1%) | 415<br>(2.7%)   | 785<br>(43.9%) | 11352<br>(17%)   |
| CA Coast Range              | N CA Coast Ranges          | 1269<br>(14.5%) | 1099<br>(27.8%) | 2564<br>(19.3%) | 332<br>(15.8%)  | 219<br>(14.4%)  | 2873<br>(14.5%) | 2206<br>(14.3%) | 497<br>(27.8%) | 11058<br>(16.6%) |
| CA Coast Range              | N CA Interior Coast Ranges | 0 (0%)          | 1 (0%)          | 34<br>(0.3%)    | 0 (0%)          | 0 (0%)          | 0 (0%)          | 115<br>(0.7%)   | 0 (0%)         | 150<br>(0.2%)    |
| Sierra                      | Sierra Nevada              | 328<br>(3.8%)   | 149<br>(3.8%)   | 5614<br>(42.3%) | 191<br>(9.1%)   | 0 (0%)          | 805<br>(4.1%)   | 5021<br>(32.6%) | 84<br>(4.7%)   | 12192<br>(18.3%) |
| Sierra                      | Sierra Nevada Foothills    | 0 (0%)          | 15<br>(0.4%)    | 253<br>(1.9%)   | 16<br>(0.8%)    | 0 (0%)          | 0 (0%)          | 425<br>(2.8%)   | 19<br>(1.1%)   | 727<br>(1.1%)    |
| Total                       |                            | 8,737           | 3,951           | 13,271          | 2,104           | 1,520           | 19,850          | 15,413          | 1,789          | 66,635           |
| % of total hardwood biomass |                            | 13%             | 6%              | 20%             | 3%              | 2%              | 30%             | 23%             | 3%             | 100%             |

Table S2: Annual rate of basal area change ( $\text{m}^2\text{yr}^{-1}$ ) on disturbed plots by disturbance type. Net change on all plots and significance test for difference from zero shown for comparison.

| Species                       | ARME    | QUGA         | QUKE    | ACMA    | CHCH    | NODE         | QUCH         | UMCA     |
|-------------------------------|---------|--------------|---------|---------|---------|--------------|--------------|----------|
| Fire                          | -34,558 | -7,002       | -72,390 | -6,189  | -9,313  | -21,315      | -91,572      | -1,067   |
| SE                            | 10,410  | 3,610        | 21,280  | 2,596   | 5,273   | 41,160       | 24,041       | 815      |
| Cut                           | -14,191 | 1,900        | -141    | -3,950  | -3,066  | -85,351      | -1,745       | -40      |
| SE                            | 8,258   | 2,108        | 3,558   | 2,993   | 2,573   | 34,351       | 1,703        | 40       |
| Fire +Cut                     | 688     | 322          | -3,467  | -1,135  |         | -1,559       | -1,277       |          |
| SE                            | 764     | 306          | 1,880   | 1,083   |         | 3,256        | 1,188        |          |
| Other                         | -798    | 1,791        | 215     | 274     | -636    | 968          | 1,453        | 52       |
| SE                            | 640     | 1,120        | 574     | 262     | 455     | 2,674        | 1,427        | 52       |
| Total disturbed plots         | -48,859 | -2,990       | -75,782 | -11,000 | -13,015 | -107,256     | -93,141      | -1,055   |
| SE                            | 13,322  | 4,338        | 21,662  | 4,116   | 5,885   | 53,783       | 24,171       | 818      |
| Total all plots               | 5,028   | 23,576       | -38,539 | 1,270   | -2,705  | 104,379      | 81,766       | 39,345   |
| SE                            | 19,867  | 8,528        | 25,266  | 7,451   | 7,419   | 59,842       | 29,028       | 6,985    |
| Z-test for overall difference | 0.25    | 2.76         | 1.53    | 0.17    | 0.36    | 1.74         | 2.82         | 5.63     |
| P-value                       | 0.4     | <b>0.003</b> | 0.064   | 0.432   | 0.358   | <b>0.041</b> | <b>0.002</b> | <b>0</b> |
